# Supplementary material
Source: PubMed Central journal article supplement (PMC4451186)
Supplement: NIHMS645117-supplement-1.pdf [file NIHMS645117-supplement-1.pdf]

## Supplementary Figures

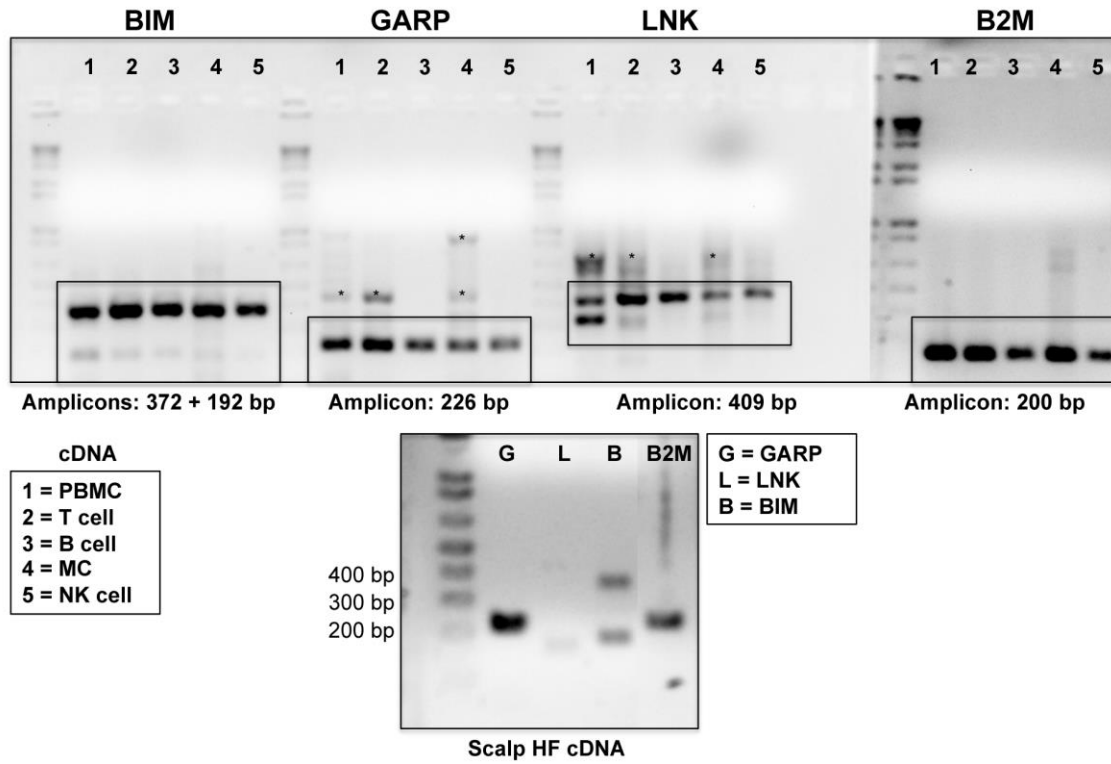

**Supplementary Figure 1. Full blot results of rt-PCR.** The original gel images that were used to create Figure 4A are presented.

## Supplementary Tables

**Supplementary Table 1. Study samples.** Study samples for the meta-analysis and replication studies were ascertained in the United States (US) and central Europe. All US cases were ascertained through the National Alopecia Areata Registry (NAAR). The US cases included in the meta-analysis are the same cohort previously reported in our initial Genome-wide Association Study (GWAS).<sup>1</sup> The US controls used in the meta-analysis are the same cohorts used in our initial GWAS,<sup>1</sup> and were ascertained through the New York Center Project<sup>2</sup> or the Cancer Genetic Markers of Susceptibility (CGEMS) breast<sup>3</sup> and prostate<sup>4</sup> cancer studies. The US cases used in the replication study are an independent sample of NAAR participants who self-report European ancestry. US controls for the replication study were either ascertained through NAAR (Sequenom genotyping) or were obtained from the NIDDK inflammatory bowel disease (IBD) genetics consortium (<http://medicine.yale.edu/intmed/ibdgc/index.aspx>) (ImmunoChip genotyping). The cohorts ascertained in central Europe had not been used in any previously published GWAS. Cases and controls were ascertained from outpatient clinics, private dermatology practices and *via* AA self-support groups in Belgium and Germany. Inclusion criteria followed published guidelines,<sup>5</sup> and additionally included diagnosis by a trained and experienced clinician. European GWAS controls included population-based controls established within the National Genome Research Network for use as universal controls (PopGen<sup>6</sup>, KORA<sup>7</sup>), and the Heinz Nixdorf Recall (HNR) Study<sup>8</sup> and an additional population-based cohort from the HNR<sup>8</sup> study.

| Analysis                         | Disease Status   | Cohort (Ascertainment Source)       | Genotyping Platform    | Publication         | Sample Count | Results              |              |  |
|----------------------------------|------------------|-------------------------------------|------------------------|---------------------|--------------|----------------------|--------------|--|
| meta analysis and HLA imputation | case             | US1 (NAAR)                          | Illumina 610           | PMID: 20596022      | 244          | Table S2<br>Table S5 |              |  |
|                                  |                  | US2 (NAAR)                          | Illumina 610           | PMID: 20596022      | 808          |                      |              |  |
|                                  |                  | Central Europe1                     | Illumina 660           | current publication | 629          |                      |              |  |
|                                  |                  | Central Europe 2                    | Illumina Omni          | current publication | 651          |                      |              |  |
|                                  |                  |                                     |                        |                     |              |                      | <b>2,332</b> |  |
|                                  | control          | US1 (NYCP)                          | Illumina 550           | PMID: 20596022      | 1,034        |                      |              |  |
|                                  |                  | US2 (CGEMS)                         | Illumina 550           | PMID: 20596022      | 2,221        |                      |              |  |
|                                  |                  | Central Europe1 (PopGen, KORA, HNR) | Illumina Omni          | current publication | 1,282        |                      |              |  |
|                                  |                  | Central Europe2 (PopGen, KORA, HNR) | Illumina 550           | current publication | 696          |                      |              |  |
|                                  |                  |                                     |                        |                     |              |                      | <b>5,233</b> |  |
| replication                      | case             | US3 (NAAR)                          | Sequenom<br>ImmunoChip | current publication | 318          |                      |              |  |
|                                  | case             | Central Europe 3                    | Sequenom               | current publication | 446          |                      |              |  |
|                                  |                  |                                     |                        |                     |              | <b>764</b>           |              |  |
|                                  | control          | US3a (NAAR)                         | Sequenom               | current publication | 154          |                      |              |  |
|                                  | control          | US3b (NIDDK IBDGC)                  | ImmunoChip             | current publication | 1,688        |                      |              |  |
| control                          | Central Europe 3 | Sequenom                            | current publication    | 414                 |              |                      |              |  |
|                                  |                  |                                     |                        |                     | <b>2,256</b> |                      |              |  |

**Total Case Count 3,096**  
**Total Control Count 7,489**

**Supplementary Table 2. Summary of the four independent effects found to underlie the HLA association with AA.** Data is extracted from Supplementary Data 2. Odds ratios (OR) estimate the magnitude of effect in cases relative to controls.

| gene     | polymorphism           |               | pvalue                 | OR   | allele |
|----------|------------------------|---------------|------------------------|------|--------|
| HLA-DRβ1 | amino acid position 37 | coding        | 4.99x10 <sup>-73</sup> | 0.42 | Asn    |
|          |                        |               |                        | 0.74 | Ser    |
|          |                        |               |                        | 1.19 | Phe    |
|          |                        |               |                        | 1.54 | Tyr    |
|          |                        |               |                        | 1.56 | Leu    |
| HLA-DRA  | rs9268657              | intron (eQTL) | 4.48x10 <sup>-41</sup> | 1.66 | A      |
| HLA-DRβ1 | HLA-DRB1*04:01         | coding        | 1.76x10 <sup>-12</sup> | 1.64 |        |
| HLA-DRβ1 | amino acid position 13 | coding        | 4.57x10 <sup>-16</sup> | 0.57 | His    |
|          |                        |               |                        | 0.5  | Gly    |
|          |                        |               |                        | 1.35 | Ser    |
|          |                        |               |                        | 1.41 | Tyr    |
|          |                        |               |                        | 1.09 | Phe    |
|          |                        |               |                        | 0.98 | Arg    |

**Supplementary Table 3. Summary of bona fide alopecia areata risk loci.** For each of the loci in Table 1, p-values and effect estimates obtained from each of the analyses are presented. Data is extracted from Supplementary Data 1 and Supplementary Data 2.

| Locus   | Genes of Interest          | SNP        | CHR | BP          | A1A2 | Cohort      | P                     | OR   |
|---------|----------------------------|------------|-----|-------------|------|-------------|-----------------------|------|
| 6p21.32 | HLA-DQA1-2,HLADQB2         | rs9275524  | 6   | 32,783,087  | TC   | combined    | <b><u>1.8E-60</u></b> | 0.52 |
|         |                            |            |     |             |      | US1         | 9.7E-14               | 0.38 |
|         |                            |            |     |             |      | US2         | 9.9E-28               | 0.47 |
|         |                            |            |     |             |      | CE1         | 4.5E-08               | 0.67 |
|         |                            |            |     |             |      | CE2         | 1.4E-14               | 0.50 |
|         |                            |            |     |             |      | replication | 8.4E-07               | 0.54 |
| 10p15.1 | IL15RA,IL2RA               | rs3118470  | 10  | 6,141,719   | TC   | combined    | <b><u>7.7E-21</u></b> | 0.71 |
|         |                            |            |     |             |      | US1         | 3.6E-04               | 0.66 |
|         |                            |            |     |             |      | US2         | 1.3E-09               | 0.68 |
|         |                            |            |     |             |      | CE1         | 1.2E-02               | 0.83 |
|         |                            |            |     |             |      | CE2         | 2.2E-06               | 0.67 |
|         |                            |            |     |             |      | replication | 1.2E-04               | 0.71 |
| 2q33.2  | CD28,CTLA4,ICOS            | rs231775   | 2   | 204,440,959 | AG   | combined    | <b><u>2.2E-20</u></b> | 0.72 |
|         |                            |            |     |             |      | US1         | 3.3E-06               | 0.60 |
|         |                            |            |     |             |      | US2         | 1.3E-10               | 0.67 |
|         |                            |            |     |             |      | CE1         | 5.2E-02               | 0.87 |
|         |                            |            |     |             |      | CE2         | 4.8E-04               | 0.75 |
|         |                            |            |     |             |      | replication | 3.4E-05               | 0.69 |
| 6q25.1  | RAET1L,ULBP3               | rs12183587 | 6   | 150,396,301 | TG   | combined    | <b><u>5.9E-24</u></b> | 1.48 |
|         |                            |            |     |             |      | US1         | 1.0E-09               | 2.04 |
|         |                            |            |     |             |      | US2         | 4.2E-12               | 1.54 |
|         |                            |            |     |             |      | CE1         | 1.7E-03               | 1.25 |
|         |                            |            |     |             |      | CE2         | 6.6E-06               | 1.45 |
|         |                            |            |     |             |      | replication | N/A                   | N/A  |
| 11q13   | PRDX5                      | rs574087   | 11  | 63,859,524  | AG   | combined    | <b><u>8.7E-14</u></b> | 1.32 |
|         |                            |            |     |             |      | US1         | 1.4E-01               | 1.19 |
|         |                            |            |     |             |      | US2         | 5.1E-07               | 1.38 |
|         |                            |            |     |             |      | CE1         | 2.9E-03               | 1.25 |
|         |                            |            |     |             |      | CE2         | 4.9E-05               | 1.41 |
|         |                            |            |     |             |      | replication | 1.8E-02               | 1.26 |
| 12q13   | IKZF4 ( <b>Eos</b> ),ERBB3 | rs2292239  | 12  | 54,768,447  | TG   | combined    | <b><u>4.4E-09</u></b> | 1.25 |
|         |                            |            |     |             |      | US1         | 2.2E-01               | 1.15 |
|         |                            |            |     |             |      | US2         | 1.2E-08               | 1.45 |
|         |                            |            |     |             |      | CE1         | 5.9E-02               | 1.16 |
|         |                            |            |     |             |      | CE2         | 4.1E-02               | 1.20 |
|         |                            |            |     |             |      | replication | 2.8E-01               | 1.11 |
| 4q27    | IL21,IL2                   | rs7682481  | 4   | 123,743,476 | CG   | combined    | <b><u>4.8E-09</u></b> | 1.23 |
|         |                            |            |     |             |      | US1         | 6.4E-04               | 1.45 |
|         |                            |            |     |             |      | US2         | 2.5E-05               | 1.29 |
|         |                            |            |     |             |      | CE1         | 2.1E-01               | 1.10 |
|         |                            |            |     |             |      | CE2         | 6.1E-03               | 1.26 |
|         |                            |            |     |             |      | replication | 1.6E-01               | 1.14 |

|          |                             |            |    |             |    |             |                       |      |
|----------|-----------------------------|------------|----|-------------|----|-------------|-----------------------|------|
| 5q31.1   | <b>IL13,1L4</b>             | rs848      | 5  | 132,024,399 | AC | combined    | <b><u>4.8E-09</u></b> | 1.27 |
|          |                             |            |    |             |    | US1         | 1.6E-05               | 1.71 |
|          |                             |            |    |             |    | US2         | 1.3E-02               | 1.19 |
|          |                             |            |    |             |    | CE1         | 9.2E-04               | 1.33 |
|          |                             |            |    |             |    | CE2         | 1.3E-01               | 1.15 |
|          |                             |            |    |             |    | replication | 4.4E-02               | 1.24 |
| 2q13     | ACOXL,BCL2L11( <b>BIM</b> ) | rs3789129  | 2  | 111,414,511 | AC | combined    | <b><u>1.5E-08</u></b> | 1.31 |
|          |                             |            |    |             |    | US1         | 9.1E-02               | 1.29 |
|          |                             |            |    |             |    | US2         | 2.9E-03               | 1.28 |
|          |                             |            |    |             |    | CE1         | 1.7E-03               | 1.37 |
|          |                             |            |    |             |    | CE2         | 2.5E-02               | 1.29 |
|          |                             |            |    |             |    | replication | 1.5E-02               | 1.31 |
| 11q13.5  | GARP(LRRC32)                | rs2155219  | 11 | 75,976,842  | TG | combined    | <b><u>4.1E-08</u></b> | 1.21 |
|          |                             |            |    |             |    | US1         | 1.9E-01               | 1.16 |
|          |                             |            |    |             |    | US2         | 9.8E-03               | 1.17 |
|          |                             |            |    |             |    | CE1         | 3.0E-01               | 1.08 |
|          |                             |            |    |             |    | CE2         | 6.1E-04               | 1.32 |
|          |                             |            |    |             |    | replication | 2.8E-05               | 0.68 |
| 1p13.2   | PTPN22                      | rs2476601  | 1  | 114,179,091 | AG | combined    | 8.9E-08               | 1.34 |
|          |                             |            |    |             |    | US1         | 1.3E-03               | 1.67 |
|          |                             |            |    |             |    | US2         | 2.3E-02               | 1.24 |
|          |                             |            |    |             |    | CE1         | 4.0E-02               | 1.26 |
|          |                             |            |    |             |    | CE2         | 5.2E-05               | 1.76 |
|          |                             |            |    |             |    | replication | 4.3E-01               | 1.12 |
| 12q24.12 | SH2B3( <b>LNK</b> ),ATXN2   | rs653178   | 12 | 110,492,139 | TC | combined    | 1.6E-07               | 0.84 |
|          |                             |            |    |             |    | US1         | 2.3E-02               | 0.79 |
|          |                             |            |    |             |    | US2         | 2.8E-02               | 0.88 |
|          |                             |            |    |             |    | CE1         | 1.1E-01               | 0.89 |
|          |                             |            |    |             |    | CE2         | 1.6E-02               | 0.83 |
|          |                             |            |    |             |    | replication | 4.8E-04               | 0.79 |
| 16p13.13 | CIITA,CLEC16A,SOCS1         | rs3862469  | 16 | 11101581    | TC | combined    | 1.7E-07               | 0.82 |
|          |                             |            |    |             |    | US1         | 3.0E-02               | 0.77 |
|          |                             |            |    |             |    | US2         | 8.8E-03               | 0.84 |
|          |                             |            |    |             |    | CE1         | 8.0E-03               | 0.82 |
|          |                             |            |    |             |    | CE2         | 1.4E-04               | 0.71 |
|          |                             |            |    |             |    | replication | 6.8E-01               | 0.96 |
| 9q31.1   | STX17                       | rs10124366 | 9  | 101,727,524 | AG | combined    | 1.1E-05               | 0.83 |
|          |                             |            |    |             |    | US1         | 2.0E-01               | 0.86 |
|          |                             |            |    |             |    | US2         | 1.3E-07               | 0.70 |
|          |                             |            |    |             |    | CE1         | 8.9E-01               | 0.99 |
|          |                             |            |    |             |    | CE2         | 2.1E-01               | 0.89 |
|          |                             |            |    |             |    | replication | N/A                   | N/A  |
